# Supplementary material for: Aberrant methylation of MUC1 and MUC4 promoters are potential prognostic biomarkers for pancreatic ductal adenocarcinomas
Source: PubMed Central journal article supplement (PMC5173155; doi:10.18632/oncotarget.9924), 2016-06-08
Supplement: oncotarget-07-42553-s001.pdf [file oncotarget-07-42553-s001.pdf]

## Aberrant methylation of *MUC1* and *MUC4* promoters are potential prognostic biomarkers for pancreatic ductal adenocarcinomas

### SUPPLEMENTARY FIGURE AND TABLES

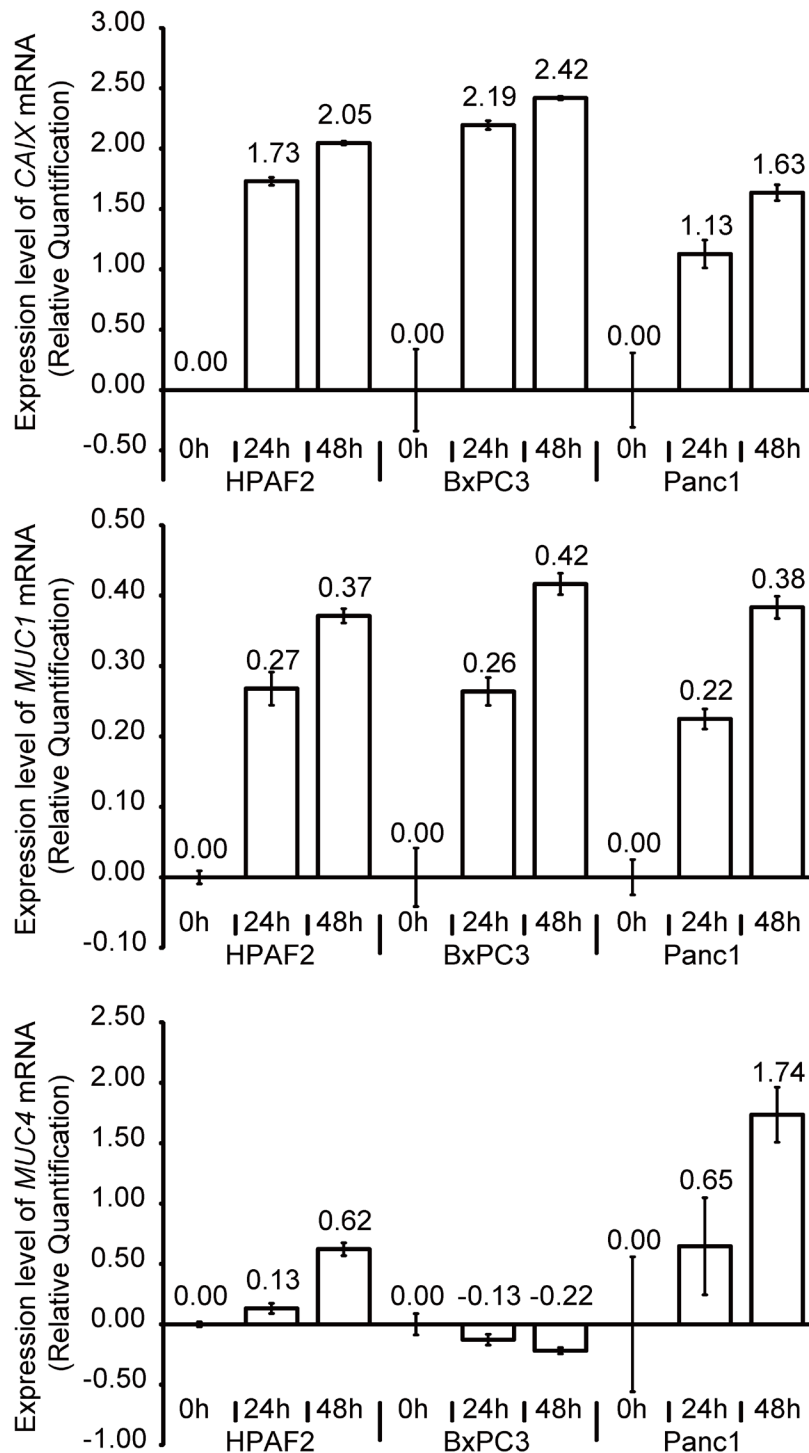

**Supplementary Figure S1: Effect of hypoxia treatment for expression level of *MUC1* and *MUC4* mRNA.** Expression of *CAIX*, *MUC1* and *MUC4* mRNA examined by quantitative real time RT-PCR. The bar graphs show gene expression levels relative to those in non-treatment of hypoxia.

Supplementary Table S1: Comparison between neoplastic and non-neoplastic regions

|                          | Neoplastic region |             | Non-neoplastic region |             | <i>p</i> value |
|--------------------------|-------------------|-------------|-----------------------|-------------|----------------|
|                          | n                 | mean ± sd   | n                     | mean ± sd   |                |
| Methylation status of    |                   |             |                       |             |                |
| <i>MUC1</i>              | 103               | 51.3 ± 17.1 | 164                   | 58.0 ± 17.6 | <0.001**       |
| <i>MUC4</i>              | 103               | 71.7 ± 18.1 | 164                   | 68.6 ± 13.7 | 0.145*         |
| mRNA expression level of |                   |             |                       |             |                |
| <i>MUC1</i>              | 103               | 1.2 ± 0.7   | 163                   | 1.1 ± 0.7   | 0.443**        |
| <i>MUC4</i>              | 103               | -0.4 ± 1.2  | 162                   | -1.2 ± 0.8  | <0.001*        |
| <i>TET1</i>              | 101               | 0.0 ± 0.5   | 161                   | 0.2 ± 0.6   | <0.001**       |
| <i>TET2</i>              | 103               | 0.6 ± 0.5   | 163                   | 0.8 ± 0.3   | <0.001**       |
| <i>TET3</i>              | 103               | 0.0 ± 0.4   | 163                   | 0.0 ± 0.4   | 0.343**        |
| <i>AID</i>               | 103               | 2.0 ± 0.7   | 163                   | 1.9 ± 0.8   | 0.294          |
| <i>DNMT1</i>             | 103               | -0.1 ± 0.5  | 164                   | 0.1 ± 0.4   | <0.001         |
| <i>DNMT3a</i>            | 103               | 0.6 ± 0.3   | 163                   | 0.7 ± 0.3   | 0.059          |
| <i>CAIX</i>              | 103               | -0.1 ± 1.3  | 162                   | -0.9 ± 1.1  | <0.001*        |

*p* value is calculated by equal variant t.test, Unequal variant t.test (\*) or Mann-Whitney U test (\*\*).



Supplementary Table S3: Synthetic oligonucleotides used in the study

| RT-PCR |                |     |                                                                                               |
|--------|----------------|-----|-----------------------------------------------------------------------------------------------|
|        | MUC1           |     | Forward: 5'-CCAGCACCGACTACTACCAAGAG-3'<br>Reverse: 5'-CGTCGTGGACATTGATGGT-3'                  |
|        | MUC4           |     | Forward: 5'-TGGGACGATGCTGACTTCTC-3'<br>Reverse: 5'-CCCCGTTGTTTGTTCATCTTTC-3'                  |
|        | TET1           |     | Forward: 5'-CCCGAATCAAGCGGAAGAATA-3'<br>Reverse: 5'-TACTTCAGGTTGCACGGT-3'                     |
|        | TET2           |     | Forward: 5'-AAGGCTGAGGGACGAGAACGA-3'<br>Reverse: 5'-TGAGCCCATCTCCTGCTTCCA-3'                  |
|        | TET3           |     | Forward: 5'-CCTGCCGATGACAAGCTGGA-3'<br>Reverse: 5'-GAGTTCCCGGATAGAGGCCGA-3'                   |
|        | AID            |     | Forward: 5'-AAAATGTCCGCTGGGCTAAG-3'<br>Reverse: 5'-AGGTCCCAGTCCGAGATGTAG-3'                   |
|        | DNMT1          |     | Forward: 5'-GAGGAAGCTGCTAAGGACTAGTTC-3'<br>Reverse: 5'-ACTCCACAATTTGATCACTAAATC-3'            |
|        | DNMT3a         |     | Forward: 5'-ACAAGAATGCCACCAAAGCAG-3'<br>Reverse: 5'-TCATCCACCAAGACACAATGC-3'                  |
|        | CAIX           |     | Forward: 5'-CGGAAGAAAACAGTGCCTATGAG-3'<br>Reverse: 5'-CAGGGCGGTGTAGTCAGAGA-3'                 |
|        | $\beta$ -actin |     | Forward: 5'-CTCTTCCAGCCTTCCTTCCTG-3'<br>Reverse: 5'-GAAGCATTGCGGTGGACGAT-3'                   |
| MSE    | MUC1           | 1st | Forward: 5'-AAAGGGGAGGTTAGTTGGA-3'<br>Reverse: 5'-TACCCCTCACCTATAAACAC-3'                     |
|        |                | 2nd | Forward: 5'-[GC clamp*]<br>AAGAGGTAGGAGGTAGGGGA-3'<br>Reverse: 5'-AAAACAAAACAAATTCAAAC-3'     |
|        | MUC4           | 1st | Forward: 5'-AGAGTAAGGGGTGTATGGGTG-3'<br>Reverse: 5'-AACCTACCCCTTCATAAC-3'                     |
|        |                | 2nd | Forward: 5'-[GC clamp*]<br>AGGAGAGAAAAGGGTGATTAG-3'<br>Reverse: 5'-ACTCCACTACCCAACAACACTAC-3' |

\*GC clamp: 5'-CGCCCGCCGCGCGCGGGCGGGGCGGGGCGGGGCGGGGGCACGGGGG-3'.
